# Supplementary material for: Crystal structure of the outer membrane protein OmpU from Vibrio cholerae at 2.2 Å resolution
Source: PubMed Central journal article supplement (PMC5786005; doi:10.1107/s2059798317017697), 2018-01-01
Supplement: d-74-00021-sup1.pdf [file d-74-00021-sup1.pdf]

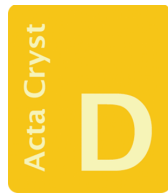

STRUCTURAL  
BIOLOGY

**Volume 74 (2018)**

**Supporting information for article:**

**Crystal structure of the outer membrane protein OmpU from  
*Vibrio cholerae* at 2.2 Å resolution**

**Huanyu Li, Weijiao Zhang and Changjiang Dong**

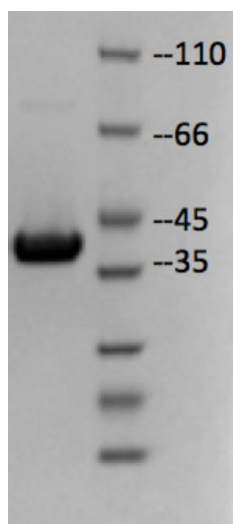

**Figure S1** . SDS-PAGE gel picture of *V. cholerae* OmpU. OmpU was highly purified. The lane on the right is protein molecular weight marker.

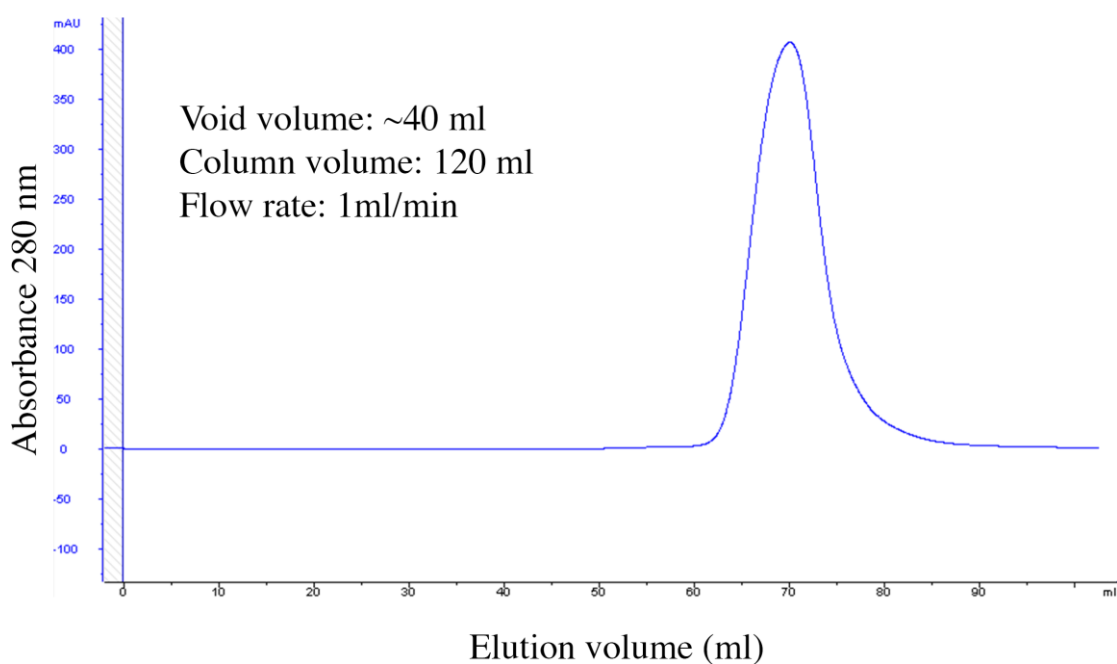

**Figure S2** Size-exclusion chromatogram of *V. cholerae* OmpU on gel filtration column. The samples were injected onto a HiLoad 16/600 Superdex 200 prep grade column (GE healthcare) pre-equilibrated with 20 mM Tris-HCL (pH 7.8), 300 mM NaCl, 0.5% C<sub>8</sub>E<sub>4</sub>. The OmpU was eluted out at 72ml, corresponding to molecular weight around 120 kDa, suggesting that the OmpU is trimeric in the detergent solution.

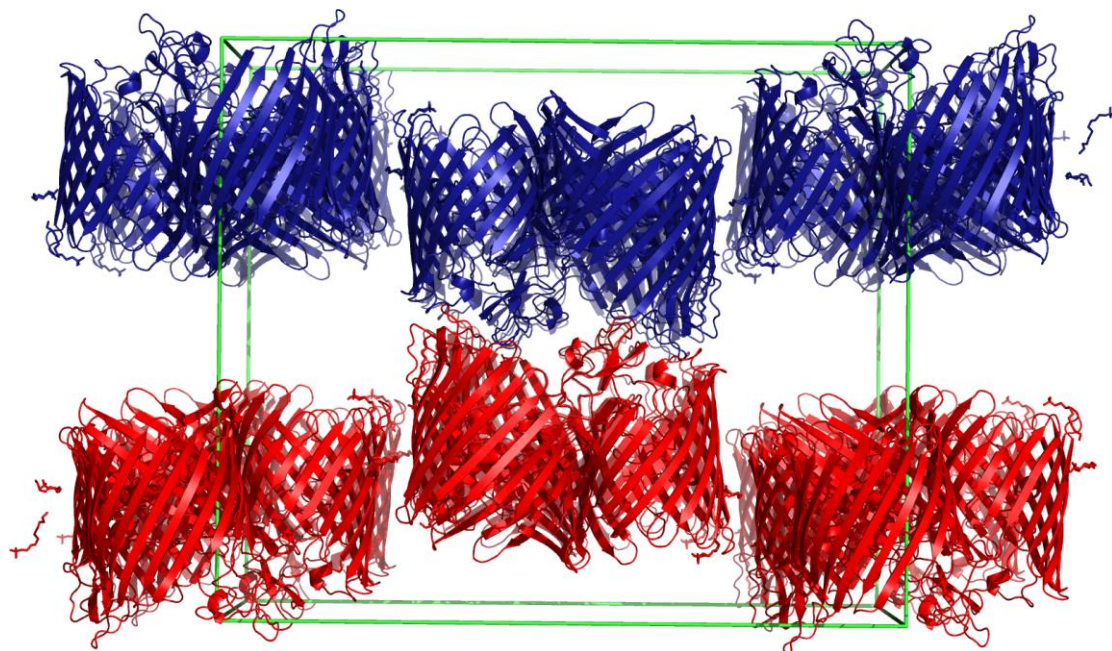

**Figure S3** OmpU trimer crystal packing in a single unit cell viewed from ab plane.

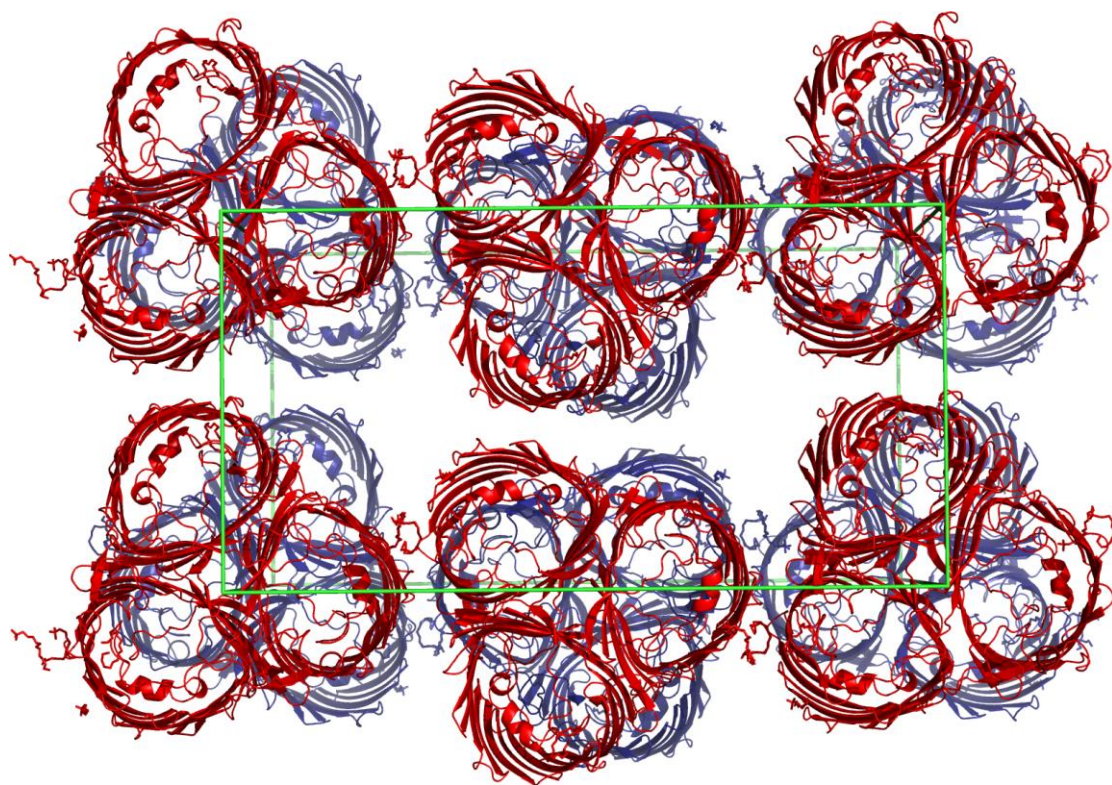

**Figure S4** OmpU trimer crystal packing in a single unit cell viewed from bc plane.

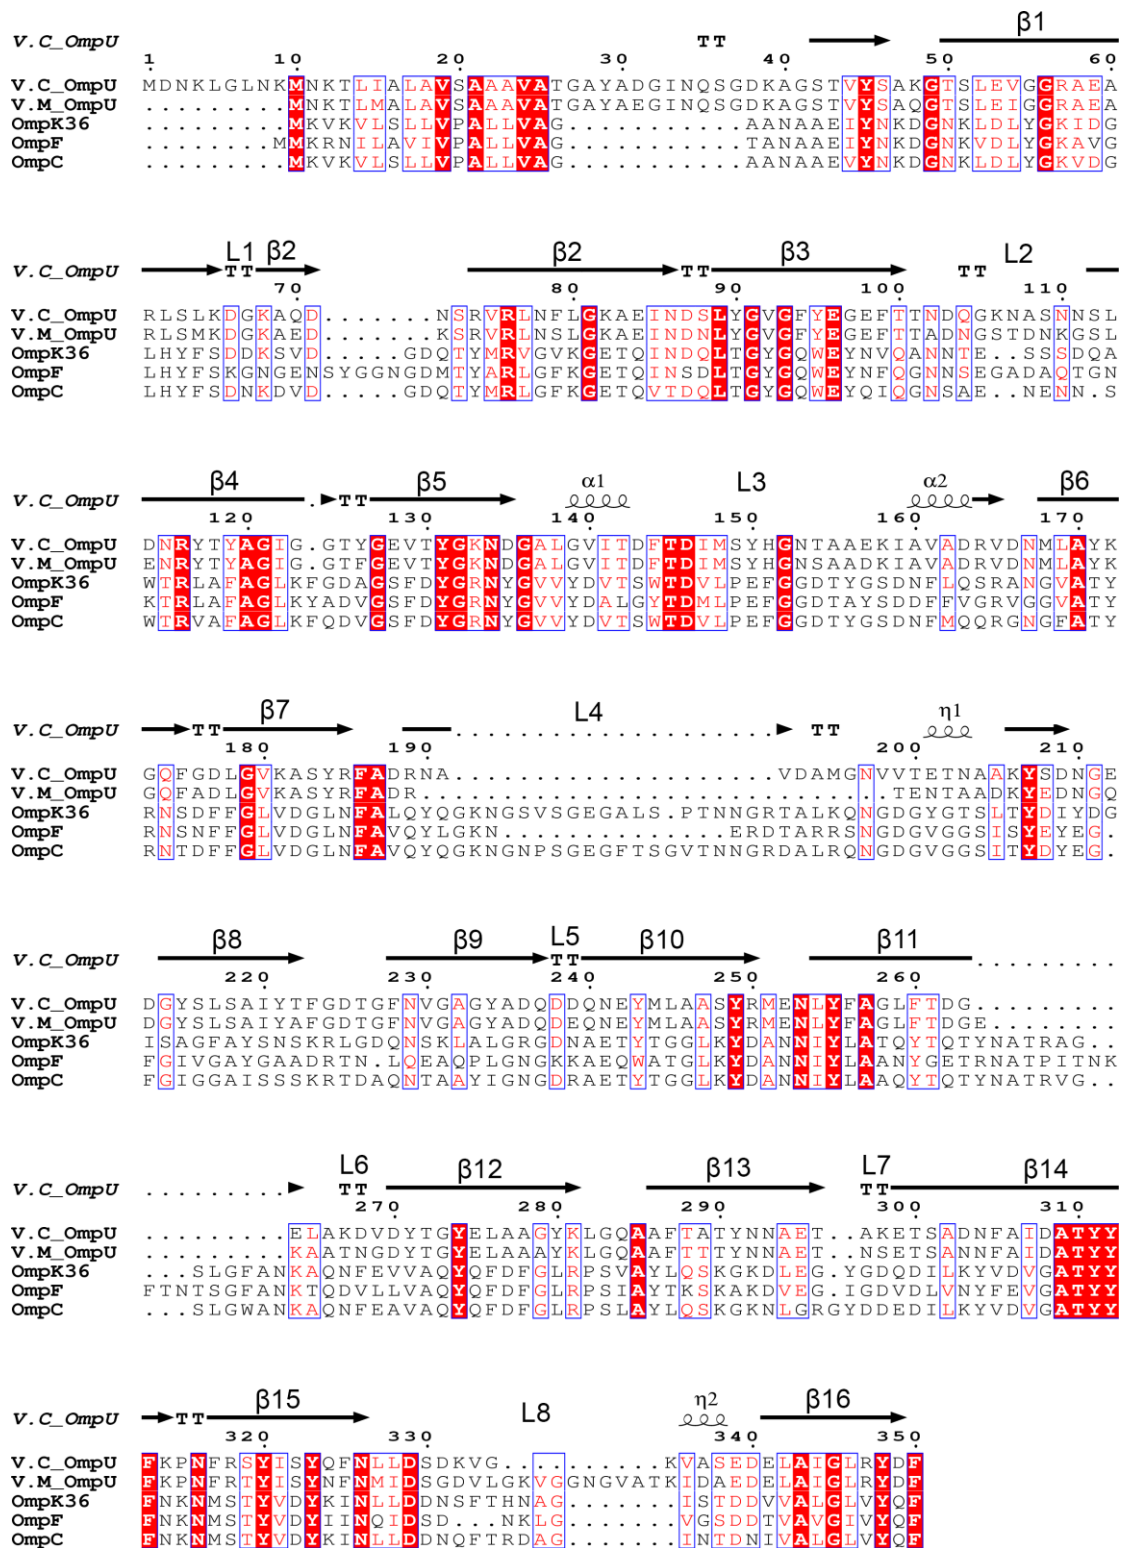

**Figure S5** Sequence alignment of *V. cholerae* OmpU with *V. mimicus* OmpU, *K. pneumoniae* OmpK36, *E. coli* OmpF and *E. coli* OmpC porins generated by ESPrpt 3.0 programme (Robert & Gouet, 2014). The secondary structure elements of *V. cholerae* OmpU are indicated above the alignment (arrows =  $\beta$ -strands; coils =  $\alpha$ -helices; TT = strict  $\beta$ -turns; L = extracellular loops). The  $\eta$  symbol represents a  $3_{10}$ -helix. Conserved residues are

highlighted in boxes. Fully conserved residues are shown in white with a red background, whereas those less conserved residues are shown in red with a white background.

### Reference

Robert, X. & Gouet, P. (2014). *Nucleic acids research* **42**, W320-W324.
